# Supplementary material for: Implementing health system and the new federalism in Somalia: challenges and opportunities
Source: Front Public Health. 2024 Feb 1;12:1205327. doi: 10.3389/fpubh.2024.1205327 (PMC10867962; doi:10.3389/fpubh.2024.1205327)
Supplement: Supplementary file 1 [file Data_Sheet_1.xlsx]

## Sheet: Sheet1
Authors	Publication Year	Journal/Book/Report	Title	Findings
Abubakar, A. M.	2016	African Journal of Political Science and International Relations	The patterns of state rebuilding and federalism in Somalia	Somalia adopted federalism in 2004 but the actual implementation of federalism in Somalia began in 2012 when Hassan Sheikh and his Ministry created a regional state consisting of four important regions, namely Galmudug, Hirshabeelle, South West, and Jubba land
Askar, A., Ardakan, M., & Majdzade, R.	2018	Eastern Mediterranean Health Journal	Bridging gaps in health information systems: a case study from Somaliland, Somalia	Somaliland has no formal policy, legislation, or plan for HMIS. An evidence-informed HMIS policy and strategy should be designed, according to experience from other nations, to accomplish significant progress in HMIS development through efficient resource mobilization, effort coordination, and intervention alignment. To enhance leadership, coordination, and harmonization of activities, some natio…
Nicolas Cook	2011	Congressional Research Service	Côte d ’ Ivoire Post-Gbagbo : Crisis Recovery	Armed struggle subsided quickly, allowing for the commencement of a post-war transition process. In addition to the 3000 reported direct fatalities, the post-election turmoil posed additional hurdles to the healthcare system. Medical professionals deserted health-care facilities in western Côte d'Ivoire and Abidjan
Abekah Nkrumah GordonRobert Ebo Hinson	2007	Int J Health Care Qual Assur.	Towards a sustainable framework for computer based health information systems (CHIS) for least developed countries (LDCs)	The main factors accounting for the sustainability problem in less developed countries include poor infrastructure, inappropriate donor policies and strategies, poor infrastructure and inadequate human resource capacity. To counter these challenges and to ensure that CHIS deployment in LDCs is sustainable, it is proposed that the activities involved in the implementation of these systems be incor…
Warsame, A., Handuleh, J., & Patel, P.	2016	International Health	Prioritization in somali health system strengthening: A qualitative study. International Health,	historically the majority of healthcare services have been concentrated in metropolitan regions, where most of these healthcare facilities are understaffed and inequitably dispersed. This is despite the fact that just 42% of the 12.3 million Somalis are urban residents; the remainder are rural residents, nomads, and internally displaced people (IDPs)
Elliot Short	2020	Report	Assessing International Statebuilding Initiative Effectiveness at Preventing Armed Conflict Recurrence: The Cases of Burundi, Chad, Côte d’Ivoire, and Nepal.
WHO	2016	Report	Service Availability and Readiness Assessment 2016: Report.	The development and gathering of accurate data is essential to the improvement of health information; however, this alone is not enough; the data also need to be managed and analyzed in the appropriate manner. In keeping with the past efforts to increase the capabilities of ministries of health in this area, the purpose of the dissemination of the data presented here in the format of the regional…
World Bank	2021	Report	Investing in health to anchor growth, Edition 6	Government leadership for the Human Development Pillar includes co-chairs from donors and representatives from the health, water and sanitation, and education sectors. There is insufficient follow-through on initiatives, a narrow focus on the health sector, and involvement from all FMSs in the platform. Each development partners and financiers has been running separate coordination structures for…
Assessment, S. J. N.	2007	Report	Social Services and Protection of Vulnerable Groups Cluster report	Healthcare Services need to be provided to the entire Somali population, especially to the vulnerable and poor in particular, with gender equality as the overarching objective. A successful cooperation will significantly boost the capacity for general absorption and execution.
Dahir, A., & Sheikh Ali, A. Y.	2021	Regional & Federal Studies	Federalism in post-conflict Somalia: A critical review of its reception and governance challenges. Regional & Federal Studies	The analysis has revealed significant practical challenges confronting Somalia's federal structure, such as constitutional ambiguity and lack of consensus on federalism, challenges with forming federal member states and demarcating their borders, the status of Mogadishu, and questions concerning fiscal federalism.
Sabrina Gaber, Preeti Patel	2013	Global public health	Tracing health system challenges in post-conflict Côte d'Ivoire from 1893 to 2013	This article uses Côte d'Ivoire to reveal that a historical multidisciplinary analysis of the country's health care system can shed light on the long-term political, economic, and social factors that have shaped it.
Gakidou, Emmanuela E, Murray, Christopher J. L, Frenk, Julio & World Health Organization. Global Programme on Evidence for Health Policy.	2001	GPE discussion paper series	Measuring preferences on health system performance assessment.	The high relative value given to responsiveness and fairness in financial contribution is an important finding of this study, with significant implications for gauging the production and outcome of health systems.
Omar, M.	2021	Somali Health Action Journal	Strategies for post-conflict development of the Health Systems in Somalia: lessons from selected countries.	Conflict can have disastrous effects on people's health and the health system that last for years after the State has entered the post-conflict phase, but it can also be a moment for reforms in the health sector of the State that is being affected.
Mubarak, M., & Mosley, J.	2014	African Arguments	on federalism and constitutionality in Somalia: Difficulties of " post-transitional institution building	The problems with the constitution and its implementation are a reflection of Mogadishu's top-down approach to institution building, which was a strategy that was adopted out of necessity by the international community, which funded the Transitional Federal Government and the process of drafting the constitution.
Gele, A.	2020	European Journal of Public Health	Challenges facing the health system in Somalia and implications for achieving the SDGs.	The existing health system is largely privatized and confined to larger cities, leaving the majority of rural poor without access to inexpensive health care. In addition, the national health system is fragmented, and the lack of a unified health system governance structure has hindered the ability of state authorities to control the private sector.
World Health Organization	2022	Report	Strategic Review of the Somali health sector: Challenges and Prioritized actions.	With an estimated 71% of the population living below the poverty line, the cumulative effect of recurrent stress factors has aggravated and increased poverty in Somalia, especially in rural regions and areas where access continues to be a challenge. In the face of persistent problems, Somalia nevertheless has among of the highest maternal mortality rates, infant and child death rates, and fertili…
World Health Organization	2015	Report	Humanitarian Response Plans. Somalia	Even though there is a critical shortage of health workers, it is hard to hire trained health workers because the jobs offered by civil service commissions aren't enough to hire all of the trained health workers who are available. Besides, there are no specific strategies or incentives to attract and place health workers in remote and rural areas. Again, pay is very low, and it takes a long time …
World Health Organization	2010	Report	A situation analysis of mental health in Somalia. World Health Organization.	In Somalia, mental health has been underfunded and neglected due to the poor distribution of resources by both the international donor community and Somalia's public health local authorities. The whole burden of caring for those who suffer from mental illness is placed on the shoulders of the family and, by extension, the communities in which they live. This places a strain on overall societal pr…
Abdi A Gele, Samera A Qureshi, Prabhjot Kour, Bernadette Kumar, Esperanza Diaz	2017	Int J Womens Health	Barriers and facilitators to cervical cancer screening among Pakistani and Somali immigrant women in Olso: a qualitative study	Research findings show that the majority of Somalians cannot afford the private health care system in Mogadishu because of its high prices and lack of regulation.
Kruk ME, Freedman LP, Anglin GA, Waldman RJ	2010	Social Science and Medicine	Rebuilding health systems to improve health and promote statebuilding in post-conflict countries: A theoretical framework and research agenda.	Health systems can be built on a solid foundation that ensures the steady delivery of vital services if national governments and their development partners put in the time and effort to design the system. They can also show their commitment to fairness, make the government more accountable to its citizens, and build the government's ability to run crucial social programs.
Bile, K., Warsame, M., & Ahmed, A. D	2022	The Lancet Global Health	Fragile states need essential national health research: the case of Somalia.	The civil war, which broke out in the 1990s, led to tragic disruptions to the health system in the long term, due to a protracted complex emergency accompanied by famines and population displacement. The transition to recovery of health-system organisation, regulation, and workforce development began in the 2010s with the institution of a transitional federal government, creating opportunities to…
Dalmar, A. A., Hussein, A. S., Walhad, S. A., Ibrahim, A. O., Abdi, A. A., Ali, M. K., Ereg, D. I., Egal, K. A., Shirwa, A. M., Hussain Aden, M., Yusuf, M. W., Abdi, Y. A., Freij, L., Johansson, A., Mohamud, K. B., Abdulkadir, Y., Emmelin, M., Eriksen, J., Erlandsson, K., … Wall, S	2017	Global Health Action	Rebuilding research capacity in fragile states: The case of a Somali–Swedish global health initiative	A programme focusing on research capacity building in the health sector is currently underway through the work of an alliance of three partner groups: six new Somali universities, five Swedish universities, and Somali diaspora professionals. Somali ownership is key to the sustainability of the programme, as is close collaboration with Somali health ministries. The programme aims to develop a mode…
Danish Immigration Service	2020	Report	Somalia Health system	Somalia has an estimated total of 846 health facilities including 7 referral hospitals, 27 district hospitals, 248 maternal and child health clinics and 544 health posts
World Bank	2021	Somalia Economic Update,edition no. 6	Investing in health to anchor growth	In Somalia, the private sector, which is largely concentrated in urban areas, is thought to provide at least 60% of healthcare services and 70% of the country's pharmaceuticals
Houston, B.	2013	Taylor and Francis	Public Trust in Government Administrators	In accordance to UN organization, the regional states should by definition not depend from the federal state in matters health service delivery, and should have the required capacity to monitor and make decisions of relevance for the preventive, curative, palliative and health promotion activities in their respective regions. The federal states are only mandated to coordinate between health actor…
Gordon, A. N., & Hinson, R. E.	2007	International Journal of Health Care Quality Assurance,	Towards a sustainable framework for computer based health information systems (CHIS) for least developed countries (LDCs)	To improve HMIS performance, it is critical to clarify roles, responsibilities and mandates among MoH management arrangements, other government agencies, the private health sector and partners. Clarifying roles and duties is essential for improving HMIS performance. This could be accomplished by enforcing HIS laws and regulations efficiently
Short, E.	2020	Mason Archival Repository Service	Assessing International Statebuilding Initiative Effectiveness at Preventing Armed Conflict Recurrence: The Cases of Burundi, Chad, Côte d’Ivoire, and Nepal.	By exploring the cases of Burundi, Chad, Côte d’Ivoire, and Nepal, it demonstrates that although statebuilding can help to achieve this goal, certain conditions and methods are required for it to be effective. When such conditions and methods are absent, donors’ resources are employed to build regimes rather than states and leave the recipient country at risk of returning to conflict.
World Health Organization	2016	Report	Service Availability and Readiness Assessment 2016	Health service delivery is the constitutional mandate of the Federal Ministry of Health and HumanResources (FMoH).This ministry is in charge of overseeing the quality control of health services, the distribution and policy of medicines, the development of human resource capacity, and coordination amongst the many players in the health sector throughout Somalia
Singh, M. P	2021	SAGE Publishing India	Federalism in India	Ethiopia has seen the edge of the imperial period, as well as the military dictatorship (1974–1991), and a massive change from a highly centralized unified nation to an almost unorthodox parliamentary-federal Constitution brought about by a freedom struggle waged by ethnolinguistic groups in various regions of the country
Danso, S. O.	2012	Managing Conflicts in Africa’s Democratic Transitions.	Post Electoral Conflict in La Côte d’Ivoire: Road Map to Peace	One of Ouattara's first initiatives was to implement “Gratuite,” or universal health care. The service, which was independently developed by the MOH, was discontinued in February 2012, except for women and children, owing to increased expenses, pilferage, and inadequate management
Ali A. Warsame, P	2020	Heritage Institute for Policy Studies and City University of Mogadishu	Somalia ’ s Healthcare System : A Baseline Study & Human Capital Development Strategy	There is an imbalance in the distribution of qualified healthcare professionals between rural and urban locations as well as between public and private health institutions as a result of their migration from less safe rural to more secure urban localities. One effect is a weakening of outreach programs for residents of remote or nomadic communities
